# Supplementary material for: E2F1 acetylation directs p300/CBP-mediated histone acetylation at DNA double-strand breaks to facilitate repair
Source: PubMed Central journal article supplement (PMC6821830; doi:10.1038/s41467-019-12861-8), 2019-10-30
Supplement: 41467_2019_12861_MOESM1_ESM.pdf [file 41467_2019_12861_MOESM1_ESM.pdf]

## Supplementary Information

**E2F1 Acetylation Directs p300/CBP-mediated Histone Acetylation at DNA Double-Strand Breaks to Facilitate Repair.**

Manickavinayaham et al.

Supplementary Information contains

Supplementary Figures 1 – 7

Supplementary Tables 1 – 3

# Supplementary Figure 1

a

## Cador 5.0

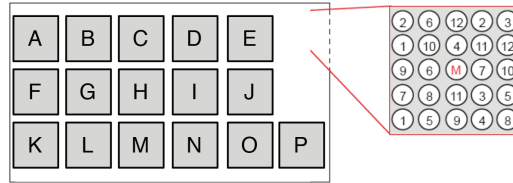

|                                                                                                                                                                                                                                                                                                                              |                                                                                                                                                                                                                                                                                                                                                                   |                                                                                                                                                                                                                                                                                                                                                             |                                                                                                                                                                                                                                                                                                                    |                                                                                                                                                                                                                                                                                                                                     |                                                                                                                                                                                             |
|------------------------------------------------------------------------------------------------------------------------------------------------------------------------------------------------------------------------------------------------------------------------------------------------------------------------------|-------------------------------------------------------------------------------------------------------------------------------------------------------------------------------------------------------------------------------------------------------------------------------------------------------------------------------------------------------------------|-------------------------------------------------------------------------------------------------------------------------------------------------------------------------------------------------------------------------------------------------------------------------------------------------------------------------------------------------------------|--------------------------------------------------------------------------------------------------------------------------------------------------------------------------------------------------------------------------------------------------------------------------------------------------------------------|-------------------------------------------------------------------------------------------------------------------------------------------------------------------------------------------------------------------------------------------------------------------------------------------------------------------------------------|---------------------------------------------------------------------------------------------------------------------------------------------------------------------------------------------|
| <b>TUDOR</b><br>A1 TDRD2(NP_006853)<br>A2 TDRD3(Q9H7E2)<br>A3 TDRD4-1(Q9NUY9)<br>A4 TDRD4-2(Q9NUY9)<br>A5 TDRD4-3(Q9NUY9)<br>A6 TDRD7-1(NP_055105)<br>A7 TDRD7-3(NP_055105)<br>A8 EBNA-2Co-A(NP_055205)<br>A9 Ret-bp1(AAB28543)<br>A10 M96(AAH10013)<br>A11 53BP1(1-2)(NP_005648)<br>A12 53BP1(1)(NP_005648)                 | <b>TUDOR +</b><br>B1 20C(NP_055876)<br>B2 RBP1 like-2 (NP_112739)<br>B3 SMN (NP_075012)<br>B4 CG1-72(NP_057102)<br>B5 PHF20(NP_057520)<br>B6 PHF20 MBT+TDR(NP_057520)<br>B7 Pombe 1(CA22822)<br>B8 JMJD2A-2(NP_055478)<br>B9 JMJD2A1-2(NP_055478)<br>B10 LBR TDR(NP_919424)<br>B11 LBR211(NP_919424)<br>B12 SPF30(c)(O75940)                                      | <b>TUDOR / Tudor-Like</b><br>C1 Lin9 TDR(b)(AAH65302)<br>C2 JMUN 2B WT(h)(NP_055830)<br>C3 AR14A (e)(NM_002892)<br>C4 PHF19(NP_00100936)<br>C5 SMD1 (e)(NM_014390)<br>C6 UHRF1 Tudor-like(a)<br>C7 C420 Tudor-Like(p)<br>C8 C460 Tudor-Like(p)                                                                                                              | <b>MBT</b><br>D1 SFMBT F.L(j)<br>D2 SFMBT 4xMBT(j)<br>D3 L3MBT1(NP_056293)<br>D4 L3(MBT)1-3(NP_056293)<br>D5 SCMH1(AAH21252)<br>D6 SCML1(NP_057413)<br>D7 SCML2(AAH64617)<br>D8 LML2(Q96BR5)<br>D9 PHF20 MBT(NP_057520)<br>D10 CG1-72-MBT(NP_057102)                                                               | <b>His-MBTs / WD40</b><br>E1 SFMBT1(a)<br>E2 SFMBT2(a)<br>E3 L3MBT1(a)<br>E4 L3MBT2(a)<br>E5 L3MBT3(a)<br>E6 SCMH1(e)<br>E7 WD40 -WDR5(d)(NP_543124)<br>E8 WD40 -WDR9(NM_018963)<br>E9 WD40 -RbAb46(d)(BT007309)<br>E10 WD40 -RbAb48(d)(X74262)<br>E11 WD40 -HIRA(CR456503)<br>E12 WD40 -Mep50(d)(AF478464)                         |                                                                                                                                                                                             |
| <b>PHD +</b><br>F1 BPTF(P+B)(BAA89208)<br>F2 ING2(e)(AAH50003)<br>F3 PHF2(NP_005383)<br>F4 PHF8(CA142860)<br>F5 DATF1(CA195708)<br>F6 Rag2(NM_000536)<br>F7 PCX1(NP_055408)<br>F8 P300(P+B)(NM_001429)<br>F9 PHF20 PHD(NP_057520)<br>F10 PHD PHF3<br>F11 PHD PHF5<br>F12 PHD CHD5 (1-2)                                      | <b>PHD</b><br>G1 Dnmt3a-His/GST(g)<br>G2 Dnmt3b-His/GST(g)<br>G3 Dnmt3L N-term-His/GST(g)<br>G4 Trim24 Brd-PHD(l)<br>G5 ING3(e) (NP_061944)<br>G6 ING4(e) (NP_001121054)<br>G7 ING5(e) (NP_115705)<br>G8 PHD_TIF1A(e) (O15164)<br>G9 TR16(e) (O15016)<br>G10 BRPF1(e) (P55201)<br>G11 MLL4(e) (Q9UMN6)<br>G12 TTF2(e) (Q9Y483)                                    | <b>PHD +</b><br>H1 JMJD2APhd+2Tudor(NP_055478)<br>H2 JMJCPhD(NP_055478)<br>H3 M96Tudor+PHD(AAH10013)<br>H4 MYST4Phd+PhD(AAH48199)<br>H5 NSD1Phd+PWWP(Q96L73)<br>H6 WHSC1Phd+PWWP(NP_579877)<br>H7 BS69Phd+ BRD(AAH12586)<br>H8 ATRX<br>H9 RAL1<br>H10 BAZ1b/WSTF<br>H11 CBF<br>H12 TAF2 (k)                                                                 | <b>BROMO</b><br>I1 GCN5(Q92830)<br>I2 TAF1- D1(NP_620278)<br>I3 TAF1- D2(NP_620278)<br>I4 P/CAF (S71788)<br>I5 SNF2 beta(S45252)<br>I6 BAF180 1-2(NP_060635)<br>I7 BAF180 3(NP_060635)<br>I8 BAF180 3-4(NP_060635)<br>I9 BAF180 5-6(NP_060635)<br>I10 KAP-1(AAB37341)<br>I11 P300(NP_004371)<br>I12 WDR9 2(Q9NS16) | <b>BROMO /SANT / TSN</b><br>J1 Bromo-BAZ(NP_075381)<br>J2 Bromo-BRD1 (AAH62700)<br>J3 SANT-MPP11-like(XP_379909)<br>J4 SANT-N-CoR2-2(Q9Y618)<br>J5 SANT-RERE(AAH62342)<br>J6 SANT-ADA2(NP_001479)<br>J7 SANT-Zuotin Rel(XP_168590)<br>J8 TSN-p100(o) (NP_055205)<br>J9 TSN-p100 m5(o) (NP_055205)<br>J10 TSN-p100 m6(o) (NP_055205) |                                                                                                                                                                                             |
| <b>CHROMO</b><br>K1 TIP60(h)(AAB18236)<br>K2 CHD2(h)(AAB87382)<br>K3 CHD4(h)(AAH38596)<br>K4 MPP8(h) (NP_059990)<br>K5 SMARCC2(h)(AAH26222)<br>K6 MRG15(h)(AAD29872)<br>K7 RBBP1(h)(AAD41239)<br>K8 PC2(h)(AAB80718 )<br>K9 PC3(h)(AAG09180)<br>K10 CHD5(h)(AAK58405)<br>K11 CHD7 (1-2)(AB037837)<br>K12 CBX5/NPCD(BC012111) | <b>CHROMO</b><br>L1 Ml-2(h)(CAA60384)<br>L2 HP1alpha(h)(P45973)<br>L3 HP1gamma(h)(NP_057671)<br>L4 Msl3-like(h)(AAD38499)<br>L5 SUV39H1(h)(AAB92224)<br>L6 CBX1/HP1 beta(h)(AAD21972)<br>L7 HP1 beta(h)(P23197)<br>L8 CDY1(h)(AAD22735)<br>L9 CHD1(e) (NP_001261)<br>L10 CBX4/PC2(e) (NM_003655)<br>L11 CBX7/RP(e) (NM_175709)<br>L12 CBX5/HP1alpha(e)(NM_012117) | <b>CHROMO / BRK /MRG</b><br>M1 CBX3(e) (NM_016587)<br>M2 CBX2(e) (NM_005180)<br>M3 CDYL2(e) (NM_152342)<br>M4 CBX8(e) (NM_020649)<br>M5 BRK SMCA2 (e)(NM_003070)<br>M6 BRK SMCA4(e) (NM_003072)<br>M7 BRK CHD6(e) (NM_032221)<br>M8 BRK CHD7 (e)(NM_017780)<br>M9 BRK_Q6DTK9 (e)(NM_025134)<br>M10 MRG_MS3L1(e) (NM_078629)<br>M11 MRG_MO4L1(e) (NM_206839) | <b>PWWP</b><br>N1 BRPF1(AAH53851)<br>N2 DNMT3B(Q9U953)<br>N4 HDGF (P51858)<br>N5 HRP-3(BAA90477)<br>N6 MSH6(P52701)<br>N7 NSD1(Q96L73)<br>N8 WHSC1-1(NP_579877)<br>N9 PSIP1(e) (NM_033222)<br>N10 BRD1(e) (NM_014577)<br>N11 ZCPW1(e)(AL136735)<br>N12 MBDS5 (e)(NM_018328)                                        | <b>PWWP / CW / SWIRM</b><br>O1 PWWP_PKCB1(e) (NM_183047)<br>O2 PWWP_HDCR3(e) (NM_016073)<br>O3 PWWP_DNM3A (e) (NM_175629)<br>O4 CW3(AAH02725)<br>O5 CW5(BAA09485)<br>O6 CW6(XP_087384)<br>O7 SWIRM_KIAA1915(BAB67808)<br>O8 SWIRM_KIAA0601(CAB72299)<br>O9 SWIRM_ADA2(NP_001479)                                                    | <b>ANK</b><br>Q1 ANK-BARD1 (NP_000456)<br>Q2 ANK-GLP(m) (AAM09024.1)<br>Q3 ANK-Notch (NP_060087)<br>Q4 ANK-IB alpha F.L. (e)<br>Other<br>Q5 TULP1<br>Q6 MecP2(i)<br>Q7 PHD_ZFP-1 His/GST(n) |

b

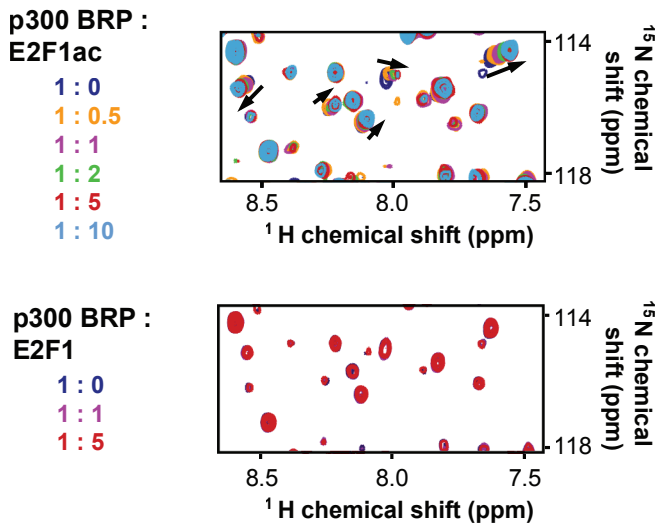

c

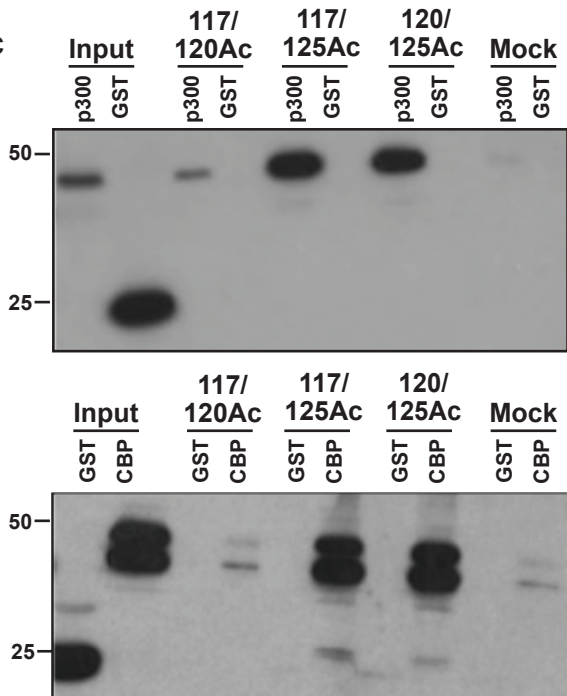

**Supplementary Figure 1: Binding of acetylated E2F1 with p300 and CBP. (a)** Layout of Cador 5.0 protein domain microarray, which contains 174 GST recombinant domain proteins. These proteins have been separated into blocks with each block consisting of up to 12 domain proteins printed in duplicate. Each block also contains a GST control located in the middle (M). **(b)**  $^1\text{H}$ ,  $^{15}\text{N}$  heteronuclear single quantum coherence (HSQC) NMR titration experiments were performed using a recombinant GST-p300 fusion protein containing the bromo, the ring finger and PHD domains (BRP) and E2F1 peptides that were either acetylated (top) or unacetylated (bottom). **(c)** Biotinylated E2F1 peptides di-acetylated at K117/120, K117/125, or K120/125 were used as bait to pull down purified GST-fusion proteins containing the bromodomain domain of p300 (top) or CBP (bottom). Following pull down, western blot for GST was performed to examine binding between p300 or CBP and the E2F1 peptides. Source data of **c** is provided as Supplementary Data 5.

## Supplementary Figure 2

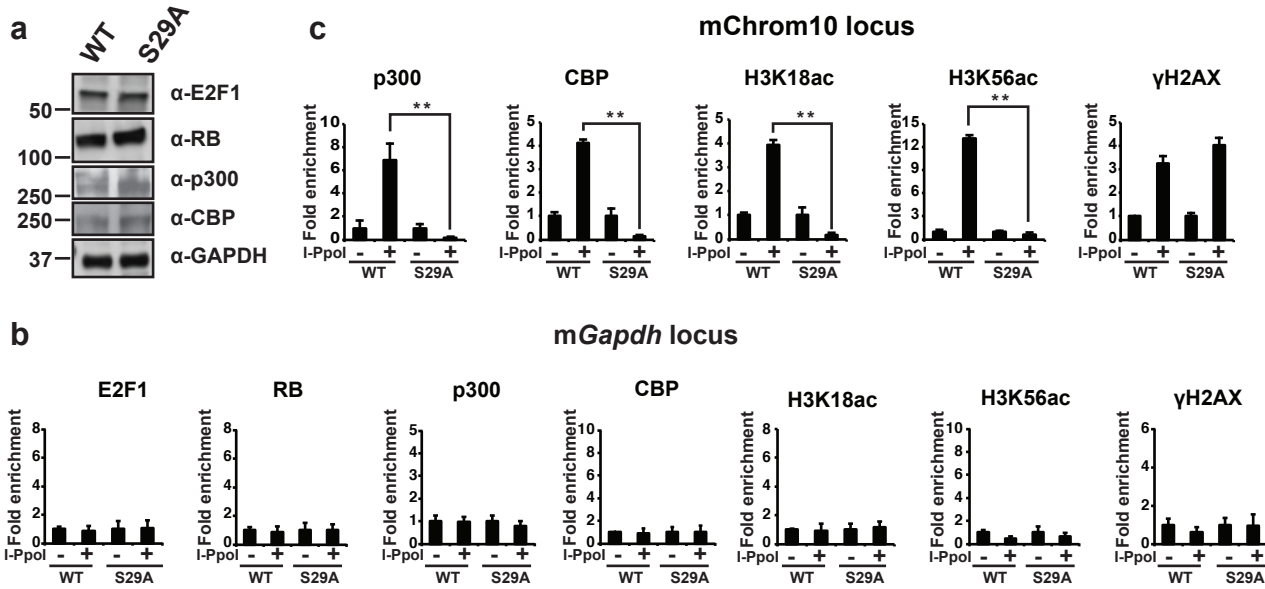

**Supplementary Figure 2: Recruitment status of p300 and CBP to control and break sites.** (a) Western blot analysis for E2F1, RB, p300, CBP and GAPDH was performed using whole cell extracts from primary wild type (WT) and *E2f1*<sup>S29A/S29A</sup> (S29A) MEFs. (b) The I-Ppol ChIP assay was performed using primary wild type (WT) and *E2f1*<sup>S29A/S29A</sup> (S29A) MEFs, uninfected (-) or infected (+) with a retrovirus expressing HA-ER\*-I-Ppol as indicated, and induced with 4-OHT for 12h. The occupancy of the indicated factors was determined at the *Gapdh* locus. (c) The same I-Ppol ChIP assay was performed and analyzed as above and occupancy for the indicated proteins was determined for a region on mouse chromosome 10 (mChrom10), 269 bp 5' to an I-Ppol cut site. All graphs represent average  $\pm$  SD of three independent experiments (n=3). P values were calculated by unpaired Student's *t*-test. (\*\*)  $P \leq 0.01$  is highly significant. Source data of a is provided as Supplementary Data 5. Raw data of b and c are in Source Data File.

### Supplementary Figure 3

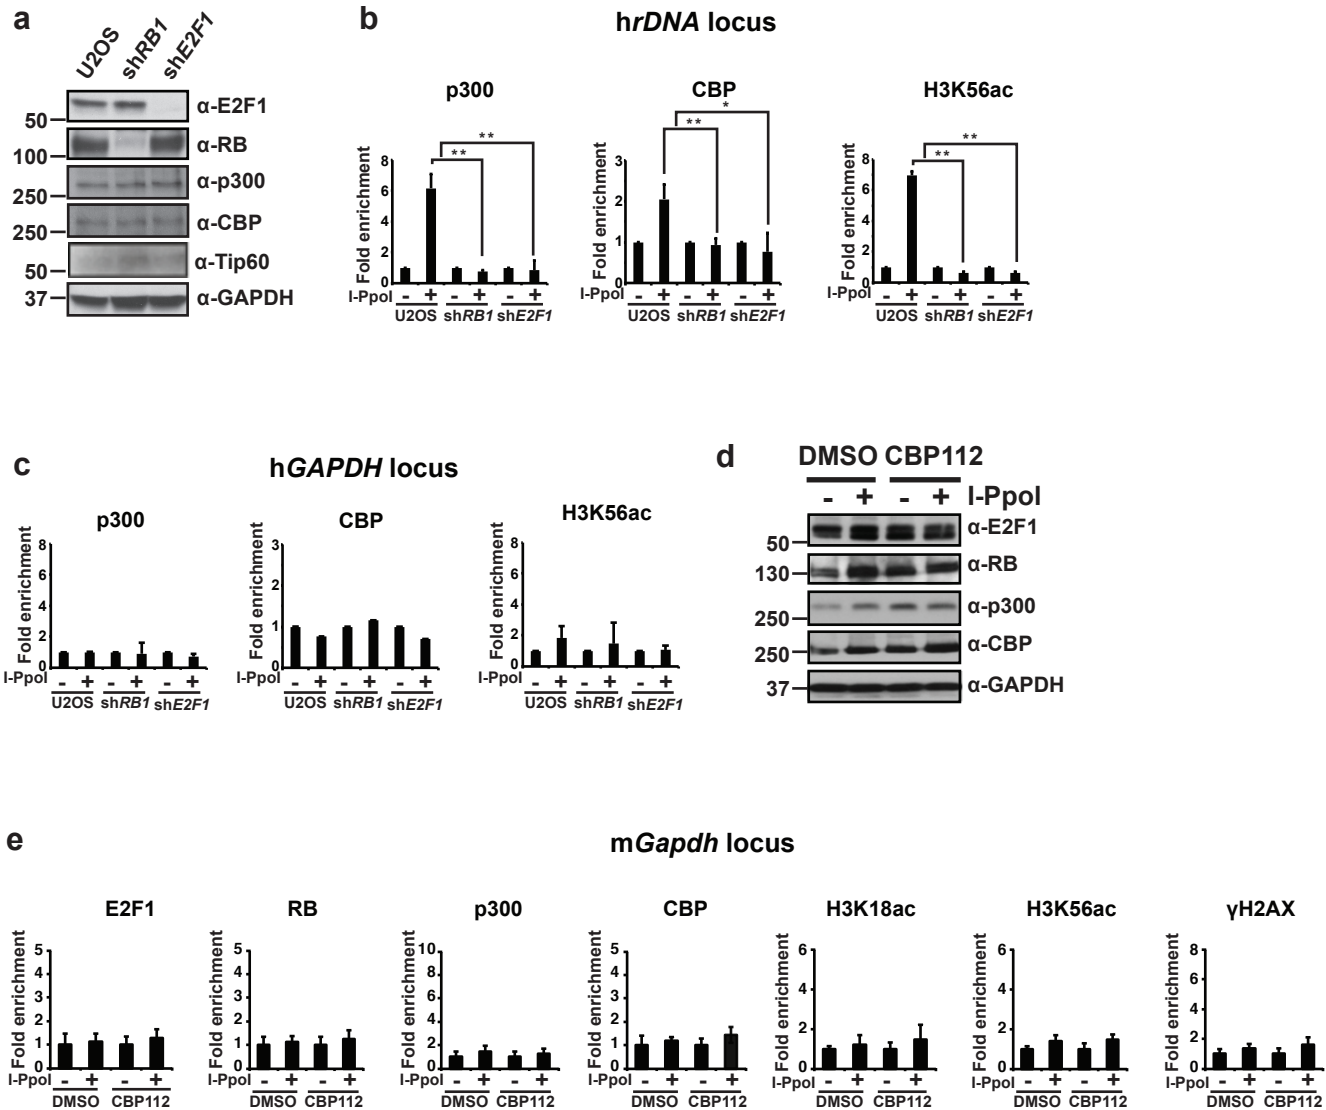

**Supplementary Figure 3: Enrichment of proteins to control and DSB sites.** (a) Western blot analysis for E2F1, RB, p300, CBP, Tip60 and GAPDH was performed using whole cell extracts from parental U2OS cells or U2OS cells depleted for RB (*shRB1*) or E2F1 (*shE2F1*). (b and c) The I-Ppol ChIP assay was performed using parental U2OS cells or U2OS cells depleted for RB (*shRB1*) or E2F1 (*shE2F1*), uninfected (-) or infected (+) with a retrovirus expressing HA-ER\*-I-Ppol as indicated, and induced with 4-OHT for 12h. The occupancy of the indicated factors was determined at the *rDNA* locus (b) and *GAPDH* locus (c). (d) Western blot analysis for E2F1, RB, p300, CBP and GAPDH was performed using whole cell extracts from primary wild type MEFs, untreated (DMSO vehicle) or treated with the CBP112 bromodomain inhibitor compound (1 $\mu$ M for 24h), and either minus (-) or plus (+) I-Ppol induction as indicated. (e) The I-Ppol ChIP assay was performed in primary wild type (WT) MEFs as indicated above, either with DMSO or CBP112 treatment. The occupancy of the indicated factors was determined at the *Gapdh* locus. All graphs represent average  $\pm$  SD of three independent experiments (n=3). P values were calculated by unpaired Student's *t*-test. (\*\*) P  $\leq$  0.01 is highly significant. (\*) P  $\leq$  0.05 is significant. Source data of d is provided as Supplementary Data 5. Raw data of b, c and e are in Source Data File.

## Supplementary Figure 4

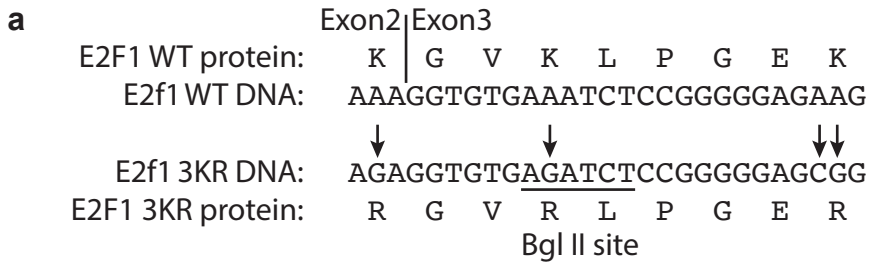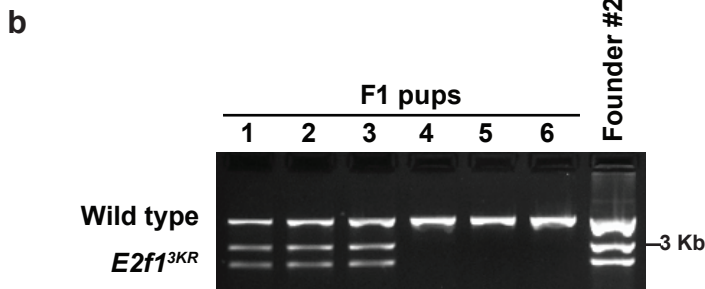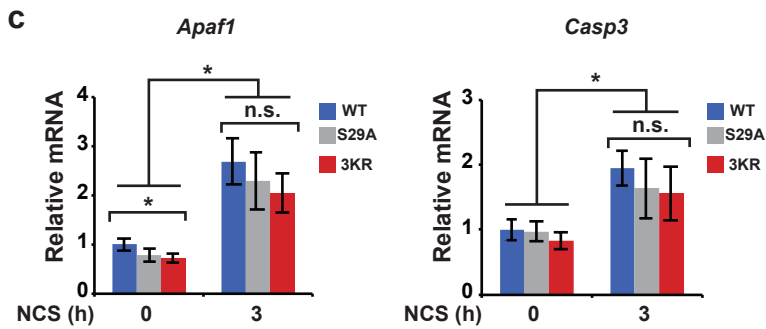

**Supplementary Figure 4: Generation of an E2F1 3KR knock-in mouse model. (a)** DNA and protein sequences of wild type and 3KR knock-in *E2f1* alleles with targeted mutations indicated. **(b)** Genotyping of founder *E2f1*<sup>3KR</sup> mouse (#2) and F1 generation offspring by PCR amplification of *E2f1* genomic region spanning exons 2 and 3 followed by digestion with Bgl II. Heterozygous founder and F1 pups having both wild type and 3KR knock-in alleles and homozygous F1 pups having only wild type allele are shown by agarose gel electrophoresis. **(c)** Primary wild type (WT), *E2f1*<sup>S29A/S29A</sup> and *E2f1*<sup>3KR/3KR</sup> (3KR) MEFs were untreated or treated with NCS (250 ng per ml) for 3h. Total RNA was isolated and cDNA was prepared by RT-PCR. Expression of *Apaf1* and *Caspase3* (*Casp3*) was determined by qPCR of three independent experiments (n=3) and represented as average ± SD. P values were calculated by unpaired Student's *t*-test. (\*) P ≤ 0.05 is significant. Source data of **b** is provided as Supplementary Data 5. Raw data of **c** is given in Source Data File.

## Supplementary Figure 5

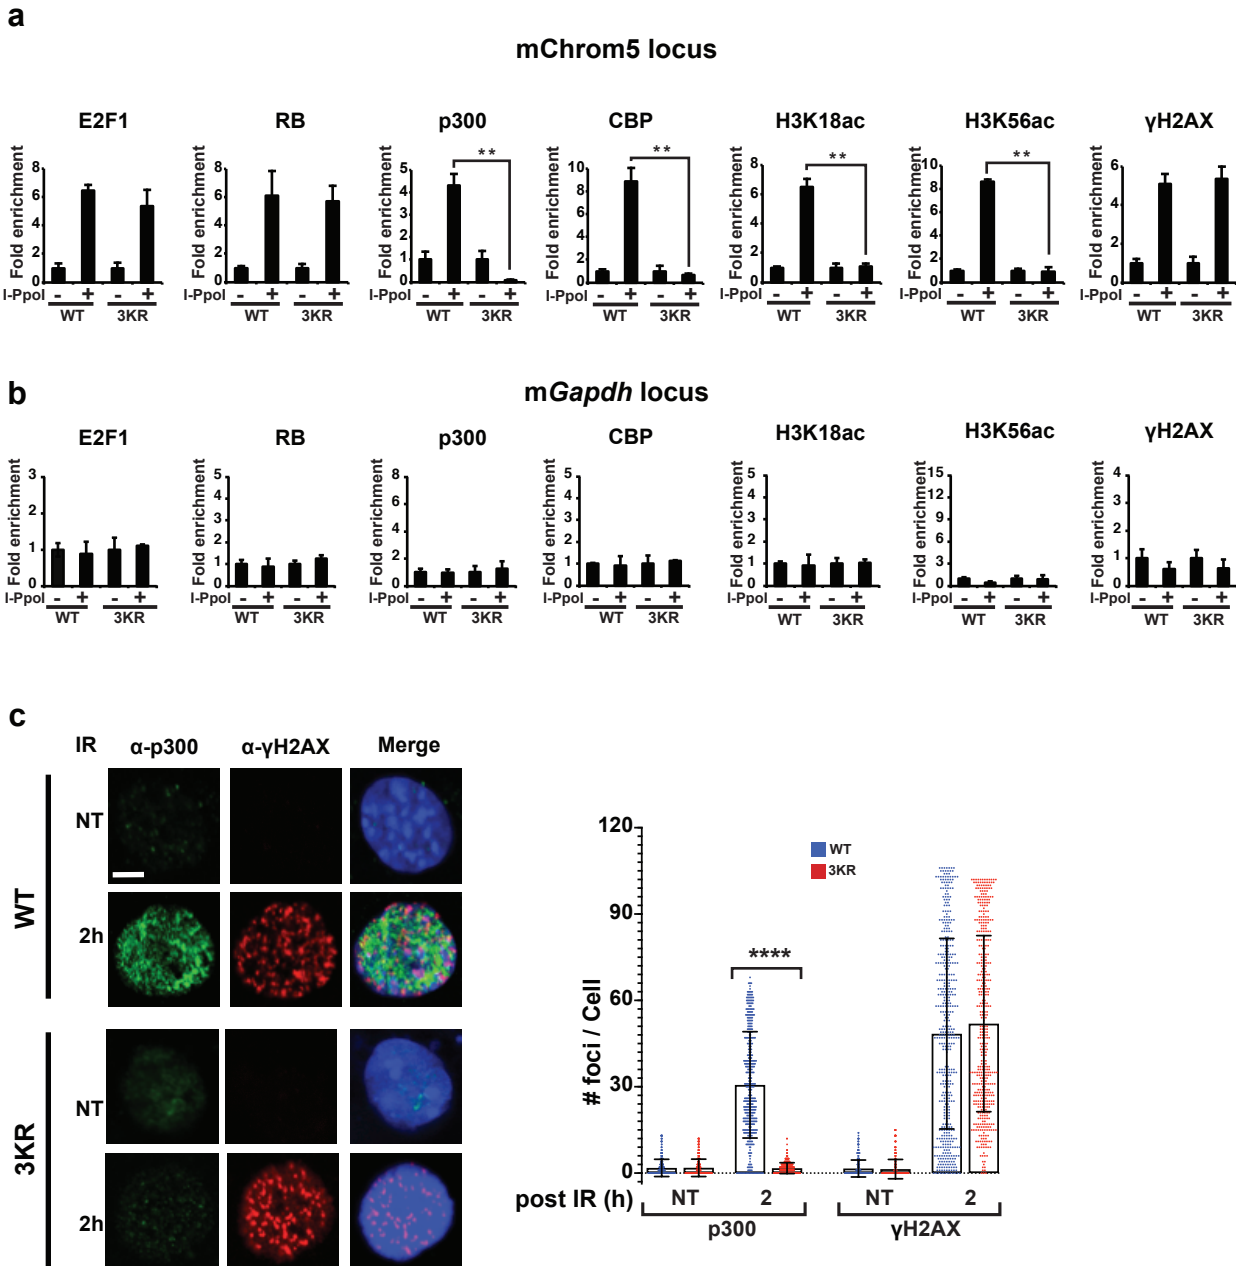

**Supplementary Figure 5: E2F1 3KR mutation impairs recruitment of p300/CBP to DSBs.** (a) The I-Ppol ChIP assay was performed using primary wild type (WT) and *E2f1*<sup>3KR/3KR</sup> (3KR) MEFs and occupancy of the indicated factors was determined for a region on mChrom5 locus. (b) The same assay was performed as above and occupancy was determined at the *Gapdh* locus. Graphs represent average  $\pm$  SD of three independent experiments ( $n=3$ ). P values were calculated by unpaired Student's *t*-test. (\*\*)  $P \leq 0.01$  is highly significant. (c) Wild type and *E2f1*<sup>3KR/3KR</sup> MEFs were mock treated (NT) or exposed to 5 Gy of IR 2h prior to in situ extraction and fixation. Representative images show formation of IR-induced foci for p300 (green) and  $\gamma$ H2AX (red) and merged with DAPI staining (blue) of nuclei. Bar, 10  $\mu$ m. Quantification of p300 and  $\gamma$ H2AX foci from the same experiment was performed. Each treatment group was in triplicate, and in total at least 450 cells ( $n > 450$ ) were counted per treatment group. Graphs represent average  $\pm$  SD of foci per cell. Overlaid scattered dot plot shows the distribution of foci. P values were calculated by unpaired Mann-Whitney *U* test. (\*\*\*\*)  $P < 0.0001$  is highly significant. Raw data of averages in graphs underlying a – c are given in Source Data File.

## Supplementary Figure 6

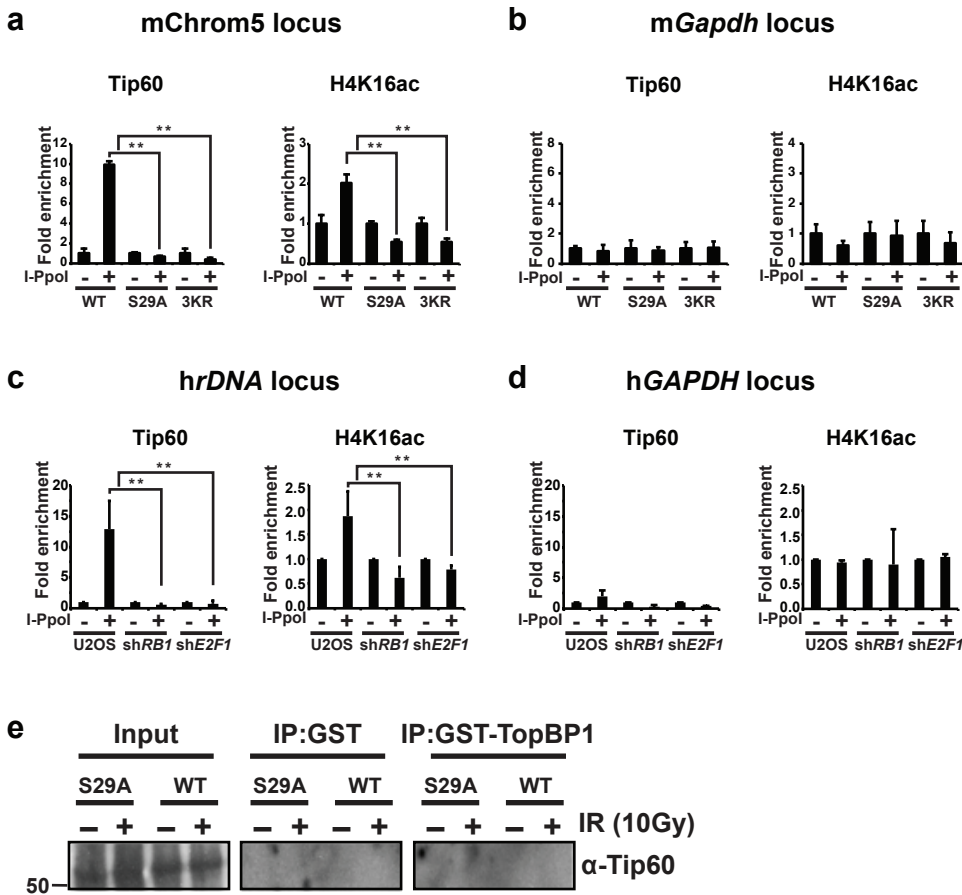

**Supplementary Figure 6: Recruitment status of Tip60 and induction of H4K16ac at control and break sites.** (a) The I-Ppol ChIP assay was performed using primary wild type (WT), *E2f1*<sup>S29A/S29A</sup> (S29A), and *E2f1*<sup>3KR/3KR</sup> (3KR) MEFs and occupancy of Tip60 and H4K16ac was determined for a region on mChrom5 locus. (b) The same assay was performed as above and occupancy was determined at the *Gapdh* locus. (c and d) The I-Ppol ChIP assay was performed using parental U2OS cells or U2OS cells depleted for RB (*shRB1*) or E2F1 (*shE2F1*) and occupancy of Tip60 and H4K16ac was determined at the *rDNA* locus (c) and *GAPDH* locus (d). All experiments were done in triplicate (n=3). P values were calculated by unpaired Student's *t*-test. (\*\*) P ≤ 0.01 is highly significant. (e) GST-TopBP1 (BRCT1-6) or GST control protein were incubated with whole cell extract from wild type (WT) or *E2f1*<sup>S29A/S29A</sup> (S29A) MEFs that were either untreated (-) or treated (+) with IR (10 Gy). Following pull down, binding of Tip60 was analyzed 2h post-IR by western blotting. From the same experiment CBP was also blotted which served as a positive control and is shown in Fig. 2a. Source data of e is provided as Supplementary Data 5. Raw data of a - d are in Source Data File.

## Supplementary Figure 7

**a**

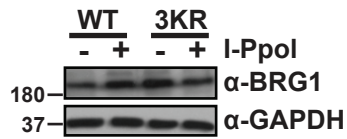

**b**

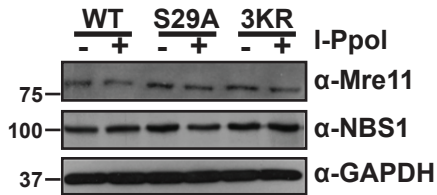

**Supplementary Figure 7: The E2F1 knock-in mutations do not affect BRG1, Mre11 and NBS1 protein levels.** (a) Western blot analysis for BRG1 and GAPDH was performed using whole cell extracts from primary wild type (WT) and *E2f1*<sup>3KR/3KR</sup> (3KR) MEFs without (-) or with (+) I-Ppol induction. (b) Western blot analysis for Mre11, NBS1 and GAPDH was performed using whole cell extracts from primary wild type (WT), *E2f1*<sup>S29A/S29A</sup> (S29A) and *E2f1*<sup>3KR/3KR</sup> (3KR) MEFs, plus (+) and minus (-) I-Ppol induction. Source data of **a** and **b** are provided as Supplementary Data 5.



**Supplementary Table 1: List of reagents used in this study**

| REAGENT                                                      | SOURCE                    | IDENTIFIER  |
|--------------------------------------------------------------|---------------------------|-------------|
| Dithiothreitol                                               | Gold Biotechnology        | 27565-41-9  |
| <sup>15</sup> NH <sub>4</sub> Cl                             | Sigma                     | 299251      |
| IPTG                                                         | Gold biotechnology        | I2481C100   |
| Glutathione-Sepharose 4B beads                               | Thermo Fisher Sci         | 16101       |
| NI-NTA Agarose                                               | Qiagen                    | 30250       |
| PreScission protease                                         | Home expressed            | N/A         |
| Streptavidin Agarose beads                                   | EMD-Millipore             | 16-126      |
| L-Glutathione Reduced                                        | Sigma                     | G4251       |
| I-CBP112                                                     | Xcess Biosciences Inc     | M60128-2s   |
| Formaldehyde                                                 | Sigma                     | F8775       |
| 4-hydroxy tamoxifen                                          | Sigma                     | H-7904      |
| ChIP-Grade Protein G Magnetic Beads                          | Cell Signaling Technology | 9006        |
| Protease Inhibitor Cocktail tablets<br>(Complete, EDTA-free) | Roche                     | 11873580001 |
| Phosphatase Inhibitor Cocktail tablets<br>(PhosSTOP)         | Roche                     | 04906837001 |
| Trichostatin A (TSA)                                         | Sigma                     | T1952       |
| EX-527                                                       | Selleckchem.com           | S1541       |
| iTaq Universal SYBR Green Supermix                           | Bio-Rad                   | 172-5124    |
| Western Lightning <sup>®</sup> Plus - ECL                    | Perkin Elmer              | NEL104001EA |
| DAPI                                                         | Invitrogen                | D1306       |
| Background Sniper                                            | Biocare                   | BS966H      |
| DaVinci Green                                                | Biocare                   | PD900L      |
| SuperScript II Reverse Transcriptase                         | Invitrogen                | 18064-014   |
| dNTP Mix                                                     | Invitrogen                | 18427-013   |
| Neocarzinostatin (NCS)                                       | Sigma                     | N9162       |
| Colcemid                                                     | Gibco                     | 15212-012   |

## Supplementary Table 2: List of antibodies used in this study

| ANTIBODY                      | DILUTION                                 | SOURCE                    | IDENTIFIER                     |
|-------------------------------|------------------------------------------|---------------------------|--------------------------------|
| anti-GST (Z-5)                | WB – 1:1000                              | Santa Cruz Biotechnology  | Cat#sc-459; RRID: AB_631586    |
| anti-E2F1 (C-20)<br>TransCruz | WB – 1:10000<br>ChIP – 6 µg              | Santa Cruz Biotechnology  | Cat#sc-193; RRID: AB_631394    |
| anti-E2F1 (KH95)              | WB – 1:1000                              | Santa Cruz Biotechnology  | Cat#sc-251; RRID: AB_627476    |
| Anti-Ac-lysine (AKL5C1)       | WB – 1:1000                              | Santa Cruz Biotechnology  | Cat#sc-32268; RRID: AB_627898  |
| anti-RB (C-15)<br>TransCruz   | WB – 1:10000<br>ChIP – 6 µg              | Santa Cruz Biotechnology  | Cat#sc-50; RRID: AB_632339     |
| anti-p300 (C-20)<br>TransCruz | WB – 1:5000<br>ChIP – 6 µg<br>IF – 1:500 | Santa Cruz Biotechnology  | Cat#sc-585; RRID: AB_2231120   |
| anti-CBP (A-22)<br>TransCruz  | WB – 1:5000<br>ChIP – 6 µg<br>IF – 1:250 | Santa Cruz Biotechnology  | Cat#sc-369; RRID: AB_631006    |
| anti-H3K18ac                  | ChIP – 5 µl                              | EMD-Millipore             | Cat#07-354; RRID: AB_441945    |
| anti-H3K56ac                  | ChIP – 10 µl                             | Cell Signaling Technology | Cat#4243; RRID: N/A            |
| anti-γH2AX (Ser139)           | WB – 1:2000<br>ChIP – 6 µg               | Cell Signaling Technology | Cat#2577; RRID: AB_2118010     |
| anti-γH2AX (Ser139)           | IF – 1:10000                             | EMD-Millipore             | Cat#05-636; RRID: AB_309864    |
| anti-pATM (Ser1981)           | WB – 1:2000                              | Cell Signaling Technology | Cat#5883; RRID: AB_10835213    |
| anti-Cleaved Lamin A          | IHC – 1:100                              | Cell Signaling Technology | Cat#2035; RRID: N/A            |
| anti-53BP1                    | IF – 1:250                               | Bethyl Laboratories, Inc. | Cat#A300-272A; RRID: AB_185520 |
| anti-GAPDH (clone 6C5)        | WB – 1:10000                             | EMD-Millipore             | Cat#MAB374; RRID: AB_2107445   |
| anti-Tip60                    | WB – 1:1000<br>ChIP – 6 µg               | Abcam                     | Cat#ab23886; RRID: AB_778485   |
| anti-H4K16ac                  | ChIP – 6 µg                              | EMD-Millipore             | Cat#07-329; RRID: AB_310525    |
| anti-BRG1 (H-88)              | WB – 1:1000<br>ChIP – 6 µg               | Santa Cruz Biotechnology  | Cat#sc-10768; RRID: AB_2255022 |
| anti-Histone H3 (D1H2) XP     | WB – 1:5000<br>ChIP – 10 µl              | Cell Signaling Technology | Cat#4499; RRID: AB_10544537    |
| anti-NBS1                     | WB – 1:1000<br>ChIP – 10 µl              | Cell Signaling Technology | Cat#3002; RRID: AB_331499      |
| anti-Mre11                    | WB – 1:4000<br>ChIP – 10 µl              | Cell Signaling Technology | Cat#4895; RRID: AB_2145100     |
| anti-phospho p53 (Ser15)      | WB – 1:2000                              | Cell Signaling Technology | Cat#9284; RRID: AB_331464      |

Cat# - Catalog Number; RRID – Research Resource Identifiers

WB – Western blotting; ChIP – Chromatin Immunoprecipitation; IF – Immunofluorescence; IHC - Immunohistochemistry

**Supplementary Table 3: List of primers used in this study**

| PRIMER                                                                | SOURCE                               | IDENTIFIER |
|-----------------------------------------------------------------------|--------------------------------------|------------|
| Random Hexamer<br>5'-d (NNNNNN) -3' N = G, A, T or C                  | Thermo Scientific                    | SO142      |
| mChrom5 locus_Forward:<br>TGGGAATCTCATTTCATCCATT                      | This paper                           | N/A        |
| mChrom5 locus_Reverse:<br>CCAGAAGGTCAGAAGGATCG                        | This paper                           | N/A        |
| mChrom10 locus_Forward:<br>CATGCATGAATGGAATGAGGA                      | This paper                           | N/A        |
| mChrom10 locus_Reverse:<br>CAGGGAAGGAAGAGCATGAG                       | This paper                           | N/A        |
| m <i>Gapdh</i> locus_Forward:<br>TTCTCGGGCAAAAATGAGAG                 | This paper                           | N/A        |
| m <i>Gapdh</i> locus_Reverse:<br>TTCCATCCTCCAGAAACCAG                 | This paper                           | N/A        |
| hChrom1 locus:<br>TGCTGCTTTTTCTTCTTCTCC<br>CTTCTTTCCCACCAAGTCTTC      | <sup>22</sup> Berkovich et al., 2008 | N/A        |
| hrDNA locus:<br>TGGAGCAGAAGGGCAAAAGC<br>TAGGAAGAGCCGACATCGAAGG        | <sup>22</sup> Berkovich et al., 2008 | N/A        |
| h <i>GAPDH</i> locus:<br>TCGGTTCTTGCCTCTTGTC<br>CTTCCATTCTGTCTTCCACTC | <sup>22</sup> Berkovich et al., 2008 | N/A        |
| <i>p73</i> mRNA_Forward:<br>GCACCTACTTTGACCTCCCC                      | PrimerBank                           | 30794514a1 |
| <i>p73</i> mRNA_Reverse:<br>GCACTGCTGAGCAAATTGAAC                     | PrimerBank                           | 30794514a1 |
| <i>Apaf1</i> mRNA_Forward:<br>AGTAATGGGTCCTAAGCATGTTG                 | PrimerBank                           | 6857755a1  |
| <i>Apaf1</i> mRNA_Reverse:<br>GCGATTGGGAAAATCACGTAATA                 | PrimerBank                           | 6857755a1  |
| <i>Casp3</i> mRNA_Forward:<br>TGGTGATGAAGGGGTCATTTATG                 | PrimerBank                           | 24416451a1 |
| <i>Casp3</i> mRNA_Reverse:<br>TTCGGCTTTCCAGTCAGACTC                   | PrimerBank                           | 24416451a1 |
| <i>Gapdh</i> mRNA_Forward:<br>AGAACATCATCCCTGCATCC                    | This paper                           | N/A        |
| <i>Gapdh</i> mRNA_Reverse:<br>CACATTGGGGGTAGGAACAC                    | This paper                           | N/A        |
