# Supplementary material for: E2F1 acetylation directs p300/CBP-mediated histone acetylation at DNA double-strand breaks to facilitate repair
Source: PubMed Central journal article supplement (PMC6821830; doi:10.1038/s41467-019-12861-8), 2019-10-30
Supplement: 41467_2019_12861_MOESM5_ESM.pdf [file 41467_2019_12861_MOESM5_ESM.pdf]

**Supplementary Data 1: List of gene sets significantly enriched in wild type MEFs compared to *E2f1*<sup>3KR/3KR</sup> before DNA damage. False Discovery Rate (FDR), q value  $\leq$  0.05.**

| #  | NAME                                                                     | FDR q-value |
|----|--------------------------------------------------------------------------|-------------|
| 1  | NEUROTRANSMITTER_TRANSPORT(4)                                            | 0.002       |
| 2  | NEUROTRANSMITTER_SECRETION(5)                                            | 0.001       |
| 3  | REGULATION_OF_AXON_EXTENSION(5)                                          | 0.003       |
| 4  | REGULATION_OF_NEUROTRANSMITTER_LEVELS(4)                                 | 0.003       |
| 5  | REGULATION_OF_EXTENT_OF_CELL_GROWTH(5)                                   | 0.005       |
| 6  | POSITIVE_REGULATION_OF_NEURON_DIFFERENTIATION(5)                         | 0.010       |
| 7  | REGULATION_OF_POSTSYNAPTIC_MEMBRANE_POTENTIAL(4)                         | 0.013       |
| 8  | AUTONOMIC_NERVOUS_SYSTEM_DEVELOPMENT(5)                                  | 0.012       |
| 9  | POSITIVE_REGULATION_OF_AXON_EXTENSION(5)                                 | 0.012       |
| 10 | ADULT_LOCOMOTORY_BEHAVIOR(4)                                             | 0.011       |
| 11 | POSITIVE_REGULATION_OF_CELL_MORPHOGENESIS_INVOLVED_IN_DIFFERENTIATION(4) | 0.010       |
| 12 | FILOPODIUM_ASSEMBLY(6)                                                   | 0.013       |
| 13 | GLIOGENESIS(7)                                                           | 0.014       |
| 14 | PARASYMPATHETIC_NERVOUS_SYSTEM_DEVELOPMENT(5)                            | 0.013       |
| 15 | CELL_CELL_ADHESION(4)                                                    | 0.012       |
| 16 | CELL_CELL_ADHESION_VIA_PLASMA_MEMBRANE_ADHESION_MOLECULES(5)             | 0.014       |
| 17 | NEUROBLAST_PROLIFERATION(5)                                              | 0.013       |
| 18 | REGULATION_OF_NEUROBLAST_PROLIFERATION(6)                                | 0.017       |
| 19 | REGULATION_OF_MEMBRANE_POTENTIAL(4)                                      | 0.017       |
| 20 | GLIAL_CELL_DIFFERENTIATION(6)                                            | 0.016       |
| 21 | NERVE_DEVELOPMENT(4)                                                     | 0.017       |
| 22 | LENS_MORPHOGENESIS_IN_CAMERA_TYPE_EYE(4)                                 | 0.018       |
| 23 | REGULATION_OF_EXCITATORY_POSTSYNAPTIC_MEMBRANE_POTENTIAL(5)              | 0.018       |
| 24 | PREGANGLIONIC_PARASYMPATHETIC_FIBER_DEVELOPMENT(5)                       | 0.020       |
| 25 | REGULATION_OF_CELL_SIZE(5)                                               | 0.020       |
| 26 | POSITIVE_REGULATION_OF_NERVOUS_SYSTEM_DEVELOPMENT(4)                     | 0.020       |
| 27 | ADULT_WALKING_BEHAVIOR(5)                                                | 0.020       |
| 28 | POSITIVE_REGULATION_OF_AXONOGENESIS(5)                                   | 0.020       |
| 29 | POSITIVE_REGULATION_OF_NEURON_PROJECTION_DEVELOPMENT(5)                  | 0.020       |
| 30 | HOMOPHILIC_CELL_ADHESION_VIA_PLASMA_MEMBRANE_ADHESION_MOLECULES(6)       | 0.022       |
| 31 | POSITIVE_REGULATION_OF_NEUROGENESIS(5)                                   | 0.022       |
| 32 | BLOOD_VESSEL_REMODELING(5)                                               | 0.024       |
| 33 | REGULATION_OF_AXONOGENESIS(6)                                            | 0.024       |
| 34 | AXON_EXTENSION(6)                                                        | 0.023       |
| 35 | POSITIVE_REGULATION_OF_CELL_PROJECTION_ORGANIZATION(4)                   | 0.023       |
| 36 | THYROID_GLAND_DEVELOPMENT(5)                                             | 0.024       |
| 37 | NEURON_PROJECTION_EXTENSION(5)                                           | 0.025       |
| 38 | LOCOMOTORY_BEHAVIOR(3)                                                   | 0.027       |
| 39 | REGULATION_OF_NEURAL_PRECURSOR_CELL_PROLIFERATION(5)                     | 0.028       |
| 40 | FOREBRAIN_NEURON_DIFFERENTIATION(6)                                      | 0.028       |
| 41 | POSITIVE_REGULATION_OF_NEURAL_PRECURSOR_CELL_PROLIFERATION(5)            | 0.028       |
| 42 | REGULATION_OF_NEUROTRANSMITTER_SECRETION(4)                              | 0.031       |
| 43 | OLIGODENDROCYTE_DIFFERENTIATION(6)                                       | 0.034       |
| 44 | DORSAL_SPINAL_CORD_DEVELOPMENT(4)                                        | 0.033       |
| 45 | DEVELOPMENTAL_CELL_GROWTH(4)                                             | 0.033       |
| 46 | POSITIVE_REGULATION_OF_NEUROBLAST_PROLIFERATION(6)                       | 0.033       |
| 47 | NEGATIVE_REGULATION_OF_NEURAL_PRECURSOR_CELL_PROLIFERATION(5)            | 0.039       |

|    |                                               |       |
|----|-----------------------------------------------|-------|
| 48 | POSITIVE_REGULATION_OF_CELL_DEVELOPMENT(5)    | 0.039 |
| 49 | AXON_DEVELOPMENT(6)                           | 0.039 |
| 50 | CELL_MATURATION(5)                            | 0.039 |
| 51 | LENS_DEVELOPMENT_IN_CAMERA_TYPE_EYE(4)        | 0.040 |
| 52 | MEMBRANE_HYPERPOLARIZATION(5)                 | 0.043 |
| 53 | REGULATION_OF_CELL_PROJECTION_ORGANIZATION(4) | 0.049 |
| 54 | SIGNAL_RELEASE(5)                             | 0.050 |
| 55 | REGULATION_OF_NEURON_DIFFERENTIATION(7)       | 0.049 |
