# Supplementary material for: E2F1 acetylation directs p300/CBP-mediated histone acetylation at DNA double-strand breaks to facilitate repair
Source: PubMed Central journal article supplement (PMC6821830; doi:10.1038/s41467-019-12861-8), 2019-10-30
Supplement: 41467_2019_12861_MOESM7_ESM.pdf [file 41467_2019_12861_MOESM7_ESM.pdf]

**Supplementary Data 3: List of gene sets significantly enriched in *E2f1*<sup>3KR/3KR</sup> compared to wild type MEFs before DNA damage. False Discovery Rate (FDR), q value ≤ 0.05.**

| #  | NAME                                                                                                 | FDR q-value |
|----|------------------------------------------------------------------------------------------------------|-------------|
| 1  | LEUKOCYTE_CHEMOTAXIS(4)                                                                              | 0.000       |
| 2  | CELL_CHEMOTAXIS(5)                                                                                   | 0.000       |
| 3  | RESPONSE_TO_OTHER_ORGANISM(3)&RESPONSE_TO_EXTERNAL_BIOTIC_STIMULUS(4)                                | 0.000       |
| 4  | RESPONSE_TO_BIOTIC_STIMULUS(3)                                                                       | 0.000       |
| 5  | RESPONSE_TO_BACTERIUM(4)                                                                             | 0.000       |
| 6  | GRANULOCYTE_MIGRATION(5)                                                                             | 0.000       |
| 7  | RESPONSE_TO_CYTOKINE(5)                                                                              | 0.000       |
| 8  | DEFENSE_RESPONSE_TO_OTHER_ORGANISM(4)                                                                | 0.000       |
| 9  | MYELOID_LEUKOCYTE_MIGRATION(4)                                                                       | 0.000       |
| 10 | NEUTROPHIL_CHEMOTAXIS(6)                                                                             | 0.000       |
| 11 | GRANULOCYTE_CHEMOTAXIS(5)                                                                            | 0.000       |
| 12 | NEUTROPHIL_MIGRATION(6)                                                                              | 0.000       |
| 13 | DEFENSE_RESPONSE_TO_BACTERIUM(5)                                                                     | 0.000       |
| 14 | CELLULAR_RESPONSE_TO_CYTOKINE_STIMULUS(6)                                                            | 0.000       |
| 15 | RESPONSE_TO_VIRUS(4)                                                                                 | 0.000       |
| 16 | INTERSPECIES_INTERACTION_BETWEEN_ORGANISMS(3)&SYMBIOSIS_ENCOMPASSING_MUTUALISM_THROUGH_PARASITISM(4) | 0.000       |
| 17 | INNATE_IMMUNE_RESPONSE(4)                                                                            | 0.000       |
| 18 | RESPONSE_TO_INTERFERON_BETA(6)                                                                       | 0.000       |
| 19 | CELLULAR_RESPONSE_TO_INTERFERON_BETA(7)                                                              | 0.000       |
| 20 | REGULATION_OF_RESPONSE_TO_BIOTIC_STIMULUS(4)                                                         | 0.000       |
| 21 | POSITIVE_REGULATION_OF_PHAGOCYTOSIS(5)                                                               | 0.000       |
| 22 | REGULATION_OF_MULTI_ORGANISM_PROCESS(3)                                                              | 0.000       |
| 23 | ANTIGEN_PROCESSING_AND_PRESENTATION(3)                                                               | 0.000       |
| 24 | LEUKOCYTE_MIGRATION(3)                                                                               | 0.000       |
| 25 | REGULATION_OF_PHAGOCYTOSIS(5)                                                                        | 0.000       |
| 26 | POSITIVE_REGULATION_OF_LEUKOCYTE_CHEMOTAXIS(5)                                                       | 0.000       |
| 27 | POSITIVE_REGULATION_OF_RESPONSE_TO_EXTERNAL_STIMULUS(4)                                              | 0.000       |
| 28 | IMMUNE_RESPONSE(3)                                                                                   | 0.001       |
| 29 | IMMUNE_EFFECTOR_PROCESS(3)                                                                           | 0.001       |
| 30 | CYTOKINE_PRODUCTION(4)                                                                               | 0.001       |
| 31 | POSITIVE_REGULATION_OF_DEFENSE_RESPONSE(4)                                                           | 0.001       |
| 32 | DEFENSE_RESPONSE(4)                                                                                  | 0.001       |
| 33 | REGULATION_OF_SYMBIOSIS_ENCOMPASSING_MUTUALISM_THROUGH_PARASITISM(4)                                 | 0.001       |
| 34 | TYPE_I_INTERFERON_PRODUCTION(5)                                                                      | 0.001       |
| 35 | POSITIVE_REGULATION_OF_CYTOKINE_SECRETION(5)                                                         | 0.001       |
| 36 | POSITIVE_REGULATION_OF_CYTOKINE_PRODUCTION(4)                                                        | 0.001       |
| 37 | ACTIVATION_OF_INNATE_IMMUNE_RESPONSE(4)                                                              | 0.001       |
| 38 | RESPONSE_TO_MOLECULE_OF_BACTERIAL_ORIGIN(5)                                                          | 0.001       |
| 39 | REGULATION_OF_B_CELL_DIFFERENTIATION(7)                                                              | 0.001       |
| 40 | CYTOKINE_SECRETION(5)                                                                                | 0.001       |
| 41 | POSITIVE_REGULATION_OF_LEUKOCYTE_MIGRATION(4)                                                        | 0.001       |
| 42 | POSITIVE_REGULATION_OF_IMMUNE_SYSTEM_PROCESS(3)                                                      | 0.001       |
| 43 | REGULATION_OF_INNATE_IMMUNE_RESPONSE(5)                                                              | 0.001       |
| 44 | REGULATION_OF_DEFENSE_RESPONSE(5)                                                                    | 0.001       |
| 45 | LEUKOCYTE_MEDIATED_IMMUNITY(4)                                                                       | 0.002       |
| 46 | NEGATIVE_REGULATION_OF_MULTI_ORGANISM_PROCESS(3)                                                     | 0.002       |

|    |                                                                                 |       |
|----|---------------------------------------------------------------------------------|-------|
| 47 | PHAGOCYTOSIS_ENGULFMENT(5)                                                      | 0.002 |
| 48 | REGULATION_OF_CYTOKINE_PRODUCTION(4)                                            | 0.002 |
| 49 | DEFENSE_RESPONSE_TO_GRAM_POSITIVE_BACTERIUM(6)                                  | 0.002 |
| 50 | HEART TRABECULA MORPHOGENESIS(5)                                                | 0.002 |
| 51 | MALE_SEX_DIFFERENTIATION(5)                                                     | 0.002 |
| 52 | DEFENSE_RESPONSE_TO_PROTOZOAN(5)                                                | 0.002 |
| 53 | REGULATION_OF_IMMUNE_SYSTEM_PROCESS(3)                                          | 0.002 |
| 54 | RESPONSE_TO_LIPOPOLYSACCHARIDE(5)                                               | 0.002 |
| 55 | ANTIGEN_PROCESSING_AND_PRESENTATION_OF_PEPTIDE_ANTIGEN(4)                       | 0.002 |
| 56 | MYELOID_DENDRITIC_CELL_ACTIVATION(5)                                            | 0.003 |
| 57 | PHAGOCYTOSIS(4)                                                                 | 0.003 |
| 58 | REGULATION_OF_LEUKOCYTE_CHEMOTAXIS(5)                                           | 0.003 |
| 59 | DEFENSE_RESPONSE_TO_VIRUS(4)                                                    | 0.003 |
| 60 | DEFENSE_RESPONSE_TO_GRAM_NEGATIVE_BACTERIUM(6)                                  | 0.003 |
| 61 | MYELOID_LEUKOCYTE_ACTIVATION(4)                                                 | 0.003 |
| 62 | IMMUNE_RESPONSE_REGULATING_SIGNALING_PATHWAY(5)                                 | 0.004 |
| 63 | CYTOKINE_MEDIATED_SIGNALING_PATHWAY(6)                                          | 0.004 |
| 64 | T_CELL_MIGRATION(5)                                                             | 0.004 |
| 65 | ACTIVATION_OF_IMMUNE_RESPONSE(3)                                                | 0.004 |
| 66 | APPENDAGE_MORPHOGENESIS(4)&LIMB_MORPHOGENESIS(5)                                | 0.004 |
| 67 | EMBRYONIC_APPENDAGE_MORPHOGENESIS(5)&EMBRYONIC_LIMB_MORPHOGENESIS(6)            | 0.004 |
| 68 | REGULATION_OF_TUMOR_NECROSIS_FACTOR_SUPERFAMILY_CYTOKINE_PRODUCTION(5)          | 0.004 |
| 69 | REGULATION_OF_CELL_KILLING(3)                                                   | 0.005 |
| 70 | ANTIGEN_PROCESSING_AND_PRESENTATION_OF_EXOGENOUS_ANTIGEN(4)                     | 0.005 |
| 71 | MEMBRANE_INVAGINATION(5)                                                        | 0.005 |
| 72 | REGULATION_OF_LEUKOCYTE_MEDIATED_CYTOTOXICITY(4)                                | 0.005 |
| 73 | APPENDAGE_DEVELOPMENT(4)&LIMB_DEVELOPMENT(5)                                    | 0.005 |
| 74 | REGULATION_OF_CYTOKINE_SECRETION(5)                                             | 0.005 |
| 75 | IMMUNE_RESPONSE_ACTIVATING_SIGNAL_TRANSDUCTION(4)                               | 0.005 |
| 76 | LEUKOCYTE_MEDIATED_CYTOTOXICITY(3)                                              | 0.005 |
| 77 | RESPONSE_TO_PROTOZOAN(4)                                                        | 0.005 |
| 78 | REGULATION_OF_TYPE_I_INTERFERON_PRODUCTION(5)                                   | 0.005 |
| 79 | CELL_KILLING(2)                                                                 | 0.005 |
| 80 | REGULATION_OF_DEFENSE_RESPONSE_TO_VIRUS(4)                                      | 0.005 |
| 81 | RESPONSE_TO_INTERFERON_GAMMA(5)                                                 | 0.005 |
| 82 | REGULATION_OF_IMMUNE_RESPONSE(4)                                                | 0.006 |
| 83 | ANTIGEN_PROCESSING_AND_PRESENTATION_OF_EXOGENOUS_PEPTIDE_ANTIGEN(5)             | 0.006 |
| 84 | TUMOR_NECROSIS_FACTOR_SUPERFAMILY_CYTOKINE_PRODUCTION(5)                        | 0.005 |
| 85 | MALE_GONAD_DEVELOPMENT(5)&DEVELOPMENT_OF_PRIMARY_MALE_SEXUAL_CHARACTERISTICS(5) | 0.006 |
| 86 | TUMOR_NECROSIS_FACTOR_PRODUCTION(6)                                             | 0.006 |
| 87 | MYELOID_LEUKOCYTE_MEDIATED_IMMUNITY(5)                                          | 0.007 |
| 88 | REGULATION_OF_LEUKOCYTE_MEDIATED_IMMUNITY(5)                                    | 0.007 |
| 89 | REGULATION_OF_ENDOCYTOSIS(4)                                                    | 0.008 |
| 90 | REGULATION_OF_TUMOR_NECROSIS_FACTOR_PRODUCTION(6)                               | 0.008 |
| 91 | INNATE_IMMUNE_RESPONSE_ACTIVATING_SIGNAL_TRANSDUCTION(5)                        | 0.008 |
| 92 | LYMPHOCYTE_MIGRATION(4)                                                         | 0.008 |
| 93 | B_CELL_MEDIATED_IMMUNITY(6)                                                     | 0.008 |
| 94 | POSITIVE_REGULATION_OF_INNATE_IMMUNE_RESPONSE(5)                                | 0.008 |
| 95 | LYMPHOCYTE_MEDIATED_IMMUNITY(5)                                                 | 0.008 |
| 96 | POSITIVE_REGULATION_OF_IMMUNE_RESPONSE(4)                                       | 0.008 |
| 97 | REGULATION_OF_MYELOID_LEUKOCYTE_MEDIATED_IMMUNITY(6)                            | 0.008 |
| 98 | REGULATION_OF_IMMUNE_EFFECTOR_PROCESS(4)                                        | 0.008 |
| 99 | POSITIVE_REGULATION_OF_LYMPHOCYTE_ACTIVATION(5)                                 | 0.009 |

|     |                                                                                                                                                                                                        |       |
|-----|--------------------------------------------------------------------------------------------------------------------------------------------------------------------------------------------------------|-------|
| 100 | ADAPTIVE_IMMUNE_RESPONSE_BASED_ON_SOMATIC_RECOMBINATION_OF_IMMUNE_RECEPTORS_BUILT_FROM_IMMUNOGLOBULIN_SUPERFAMILY_DOMAINS(5)                                                                           | 0.009 |
| 101 | POSITIVE_REGULATION_OF_TUMOR_NECROSIS_FACTOR_SUPERFAMILY_CYTOKINE_PRODUCTION(5)                                                                                                                        | 0.009 |
| 102 | LEUKOCYTE_ACTIVATION(3)                                                                                                                                                                                | 0.010 |
| 103 | FORELIMB_MORPHOGENESIS(6)                                                                                                                                                                              | 0.010 |
| 104 | IMMUNOGLOBULIN_MEDIATED_IMMUNE_RESPONSE(7)                                                                                                                                                             | 0.010 |
| 105 | PATTERN_RECOGNITION_RECEPTOR_SIGNALING_PATHWAY(6)                                                                                                                                                      | 0.010 |
| 106 | NITRIC_OXIDE_METABOLIC_PROCESS(4)&REACTIVE_NITROGEN_SPECIES_METABOLIC_PROCESS(4)&NITRIC_OXIDE_BIOSYNTHETIC_PROCESS(5)                                                                                  | 0.010 |
| 107 | POSITIVE_REGULATION_OF_ENDOCYTOSIS(4)                                                                                                                                                                  | 0.010 |
| 108 | POSITIVE_REGULATION_OF_REACTIVE_OXYGEN_SPECIES_METABOLIC_PROCESS(5)                                                                                                                                    | 0.011 |
| 109 | ADAPTIVE_IMMUNE_RESPONSE(4)                                                                                                                                                                            | 0.011 |
| 110 | POSITIVE_REGULATION_OF_LEUKOCYTE_ACTIVATION(4)                                                                                                                                                         | 0.011 |
| 111 | PROSTATE_GLAND_DEVELOPMENT(4)                                                                                                                                                                          | 0.011 |
| 112 | REACTIVE_OXYGEN_SPECIES_BIOSYNTHETIC_PROCESS(4)                                                                                                                                                        | 0.012 |
| 113 | MULTI_ORGANISM_CELLULAR_PROCESS(3)                                                                                                                                                                     | 0.012 |
| 114 | POSITIVE_REGULATION_OF_INFLAMMATORY_RESPONSE(5)                                                                                                                                                        | 0.012 |
| 115 | CELLULAR_EXTRAVASATION(4)                                                                                                                                                                              | 0.014 |
| 116 | INTERFERON_BETA_PRODUCTION(6)                                                                                                                                                                          | 0.014 |
| 117 | POSITIVE_REGULATION_OF_TYPE_I_INTERFERON_PRODUCTION(5)                                                                                                                                                 | 0.014 |
| 118 | POSITIVE_REGULATION_OF_INTERLEUKIN_1_PRODUCTION(5)                                                                                                                                                     | 0.015 |
| 119 | POSITIVE_REGULATION_OF_IMMUNE_EFFECTOR_PROCESS(4)                                                                                                                                                      | 0.015 |
| 120 | CENTRAL_NERVOUS_SYSTEM_PROJECTION_NEURON_AXONOGENESIS(8)                                                                                                                                               | 0.016 |
| 121 | REGULATION_OF_OSTEOCLAST_DIFFERENTIATION(7)                                                                                                                                                            | 0.016 |
| 122 | POSITIVE_REGULATION_OF_TUMOR_NECROSIS_FACTOR_PRODUCTION(6)                                                                                                                                             | 0.018 |
| 123 | NEGATIVE_REGULATION_OF_IMMUNE_SYSTEM_PROCESS(3)                                                                                                                                                        | 0.018 |
| 124 | REGULATION_OF_INTERFERON_BETA_PRODUCTION(6)                                                                                                                                                            | 0.018 |
| 125 | POSITIVE_REGULATION_OF_T_CELL_ACTIVATION(6)&POSITIVE_REGULATION_OF_LEUKOCYTE_CELL_CELL_ADHESION(6)                                                                                                     | 0.018 |
| 126 | SUPEROXIDE_METABOLIC_PROCESS(5)                                                                                                                                                                        | 0.019 |
| 127 | REGULATION_OF_MYELOID_CELL_DIFFERENTIATION(5)                                                                                                                                                          | 0.020 |
| 128 | POSITIVE_REGULATION_OF_CHEMOTAXIS(4)                                                                                                                                                                   | 0.020 |
| 129 | REGULATION_OF_CELL_FATE_COMMITMENT(5)                                                                                                                                                                  | 0.021 |
| 130 | POSITIVE_REGULATION_OF_PROTEIN_KINASE_B_SIGNALING(6)                                                                                                                                                   | 0.021 |
| 131 | REGULATION_OF_HEMOPOIESIS(4)                                                                                                                                                                           | 0.021 |
| 132 | PROSTATE_GLAND_MORPHOGENESIS(4)                                                                                                                                                                        | 0.021 |
| 133 | REGULATION_OF_LYMPHOCYTE_MEDIATED_IMMUNITY(6)                                                                                                                                                          | 0.021 |
| 134 | POSITIVE_REGULATION_OF_HOMOTYPIC_CELL_CELL_ADHESION(6)                                                                                                                                                 | 0.022 |
| 135 | REGULATION_OF_LYMPHOCYTE_ACTIVATION(5)                                                                                                                                                                 | 0.023 |
| 136 | POSITIVE_REGULATION_OF_HEMOPOIESIS(4)                                                                                                                                                                  | 0.024 |
| 137 | PROSTATE_GLAND_EPITHELIUM_MORPHOGENESIS(4)                                                                                                                                                             | 0.025 |
| 138 | VIRAL_PROCESS(4)                                                                                                                                                                                       | 0.025 |
| 139 | REGULATION_OF_SYNCYTIUM_FORMATION_BY_PLASMA_MEMBRANE_FUSION(4)                                                                                                                                         | 0.025 |
| 140 | EMBRYONIC_DIGIT_MORPHOGENESIS(5)                                                                                                                                                                       | 0.025 |
| 141 | REGULATION_OF_LEUKOCYTE_ACTIVATION(4)                                                                                                                                                                  | 0.025 |
| 142 | REGULATION_OF_INFLAMMATORY_RESPONSE_TO_ANTIGENIC_STIMULUS(5)                                                                                                                                           | 0.025 |
| 143 | OSTEOCLAST_DIFFERENTIATION(8)                                                                                                                                                                          | 0.026 |
| 144 | BRANCHING_INVOLVED_IN_PROSTATE_GLAND_MORPHOGENESIS(5)                                                                                                                                                  | 0.027 |
| 145 | LYMPHOCYTE_ACTIVATION(4)                                                                                                                                                                               | 0.028 |
| 146 | POSITIVE_REGULATION_OF_ADAPTIVE_IMMUNE_RESPONSE(5)&POSITIVE_REGULATION_OF_ADAPTIVE_IMMUNE_RESPONSE_BASED_ON_SOMATIC_RECOMBINATION_OF_IMMUNE_RECEPTORS_BUILT_FROM_IMMUNOGLOBULIN_SUPERFAMILY_DOMAINS(6) | 0.028 |
| 147 | REGULATION_OF_LEUKOCYTE_MIGRATION(4)                                                                                                                                                                   | 0.028 |

|     |                                                                                                                                                                         |       |
|-----|-------------------------------------------------------------------------------------------------------------------------------------------------------------------------|-------|
| 148 | RESPONSE_TO_LIPID(5)                                                                                                                                                    | 0.028 |
| 149 | APOPTOTIC_CELL_CLEARANCE(5)                                                                                                                                             | 0.030 |
| 150 | NEUTROPHIL_MEDIATED_IMMUNITY(6)                                                                                                                                         | 0.030 |
| 151 | CENTRAL_NERVOUS_SYSTEM_NEURON_AXONOGENESIS(7)                                                                                                                           | 0.030 |
| 152 | POSITIVE_REGULATION_OF_LYMPHOCYTE_DIFFERENTIATION(6)                                                                                                                    | 0.033 |
| 153 | REGULATION_OF_GRANULOCYTE_CHEMOTAXIS(6)                                                                                                                                 | 0.033 |
| 154 | AGING(4)                                                                                                                                                                | 0.033 |
| 155 | IRON_ION_TRANSPORT(8)                                                                                                                                                   | 0.034 |
| 156 | TYROSINE_PHOSPHORYLATION_OF_STAT_PROTEIN(7)                                                                                                                             | 0.034 |
| 157 | INFLAMMATORY_RESPONSE(5)                                                                                                                                                | 0.033 |
| 158 | PROTEIN_KINASE_B_SIGNALING(6)                                                                                                                                           | 0.035 |
| 159 | LEUKOCYTE_AGGREGATION(6)&LYMPHOCYTE_AGGREGATION(7)                                                                                                                      | 0.035 |
| 160 | SKELETAL_SYSTEM_DEVELOPMENT(5)                                                                                                                                          | 0.035 |
| 161 | POSITIVE_REGULATION_OF_LEUKOCYTE_DIFFERENTIATION(5)                                                                                                                     | 0.035 |
| 162 | RECOMBINATIONAL_REPAIR(5)&DOUBLE_STRAND_BREAK_REPAIR_VIA_HOMOLOGOUS_RECOMBINATION(6)                                                                                    | 0.036 |
| 163 | T_CELL_ACTIVATION(5)&T_CELL_AGGREGATION(8)                                                                                                                              | 0.036 |
| 164 | CELL_ACTIVATION(4)                                                                                                                                                      | 0.036 |
| 165 | SYNCYTIUM_FORMATION_BY_PLASMA_MEMBRANE_FUSION(5)                                                                                                                        | 0.036 |
| 166 | CELLULAR_HORMONE_METABOLIC_PROCESS(4)                                                                                                                                   | 0.037 |
| 167 | POSITIVE_REGULATION_OF_PROTEIN_SECRETION(5)                                                                                                                             | 0.037 |
| 168 | REGULATION_OF_PROTEIN_KINASE_B_SIGNALING(6)                                                                                                                             | 0.037 |
| 169 | REGULATION_OF_INFLAMMATORY_RESPONSE(5)                                                                                                                                  | 0.037 |
| 170 | REGULATION_OF_LEUKOCYTE_DIFFERENTIATION(5)                                                                                                                              | 0.037 |
| 171 | ANTIGEN_PROCESSING_AND_PRESENTATION_OF_PEPTIDE_OR_POLYSACCHARIDE_ANTIGEN_VIA_MHC_CLASS_II(4)&ANTIGEN_PROCESSING_AND_PRESENTATION_OF_PEPTIDE_ANTIGEN_VIA_MHC_CLASS_II(5) | 0.037 |
| 172 | POSITIVE_REGULATION_OF_CELL_ACTIVATION(4)                                                                                                                               | 0.037 |
| 173 | EMBRYONIC_FORELIMB_MORPHOGENESIS(7)                                                                                                                                     | 0.037 |
| 174 | POSITIVE_REGULATION_OF_LEUKOCYTE_MEDIATED_IMMUNITY(5)                                                                                                                   | 0.037 |
| 175 | GENITALIA_DEVELOPMENT(4)                                                                                                                                                | 0.038 |
| 176 | INTERLEUKIN_1_PRODUCTION(5)                                                                                                                                             | 0.040 |
| 177 | CELLULAR_RESPONSE_TO_ESTROGEN_STIMULUS(7)                                                                                                                               | 0.041 |
| 178 | TRABECULA_MORPHOGENESIS(4)                                                                                                                                              | 0.042 |
| 179 | B_CELL_DIFFERENTIATION(6)                                                                                                                                               | 0.042 |
| 180 | POSITIVE_REGULATION_OF_INTERFERON_GAMMA_PRODUCTION(5)                                                                                                                   | 0.044 |
| 181 | POSITIVE_REGULATION_OF_LEUKOCYTE_MEDIATED_CYTOTOXICITY(4)                                                                                                               | 0.046 |
| 182 | REGULATION_OF_ADAPTIVE_IMMUNE_RESPONSE_BASED_ON_SOMATIC_RECOMBINATION_OF_IMMUNE_RECEPTORS_BUILT_FROM_IMMUNOGLOBULIN_SUPERFAMILY_DOMAINS(6)                              | 0.046 |
| 183 | REGULATION_OF_ADAPTIVE_IMMUNE_RESPONSE(5)                                                                                                                               | 0.047 |
| 184 | NEGATIVE_REGULATION_OF_LEUKOCYTE_ACTIVATION(4)                                                                                                                          | 0.047 |
| 185 | CELL_ACTIVATION_INVOLVED_IN_IMMUNE_RESPONSE(4)&LEUKOCYTE_ACTIVATION_INVOLVED_IN_IMMUNE_RESPONSE(4)                                                                      | 0.047 |
| 186 | NEGATIVE_REGULATION_OF_DEFENSE_RESPONSE(4)                                                                                                                              | 0.048 |
| 187 | POSITIVE_REGULATION_OF_CELL_CELL_ADHESION(5)                                                                                                                            | 0.047 |
| 188 | REGULATION_OF_RESPONSE_TO_EXTERNAL_STIMULUS(4)                                                                                                                          | 0.048 |
| 189 | REGULATION_OF_MYELOID_LEUKOCYTE_DIFFERENTIATION(6)                                                                                                                      | 0.049 |
| 190 | INTERLEUKIN_1_BETA_PRODUCTION(6)                                                                                                                                        | 0.049 |
| 191 | MALE_GENITALIA_DEVELOPMENT(5)                                                                                                                                           | 0.049 |
| 192 | NEGATIVE_REGULATION_OF_LEUKOCYTE_APOPTOTIC_PROCESS(7)                                                                                                                   | 0.049 |
